# Supplementary material for: New cobalt-based metal–organic frameworks for catalysing sulfite in the degradation of reactive brilliant red
Source: Royal Society of Chemistry journal article supplement (doi:10.1039/d4dt03000a), 2024-11-21
Supplement: d4dt03000a1.pdf [file d4dt03000a1.pdf]

# **New cobalt-based metal-organic frameworks for catalysing sulfite in degradation of reactive brilliant red**

Yi-Ru Zhang,<sup>a</sup> Yan-Bing, Liang,<sup>a</sup> Dan Jian,<sup>a</sup> Jian-Zhong Wu,<sup>\*b</sup> and Yong-Cong Ou<sup>\*a</sup>

*a Guangdong Provincial Key Laboratory of Carbon Dioxide Resource Utilization, School of Chemistry, South China Normal University, Guangzhou 510006, China. Email:*

*[ouyongcong@m.scnu.edu.cn](mailto:ouyongcong@m.scnu.edu.cn)*

*b Key Laboratory of Theoretical Chemistry of Environment, Ministry of Education, School of Chemistry, South China Normal University, Guangzhou 510006, China. Email:*

*[wujzh@scnu.edu.cn](mailto:wujzh@scnu.edu.cn)*

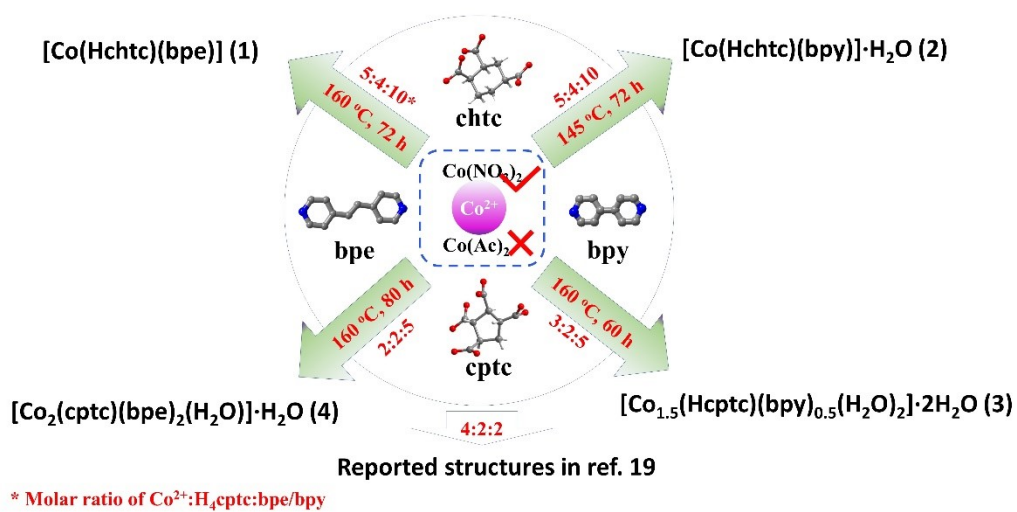

**Figure S1.** The reaction scheme for the four structures in different synthetic conditions.

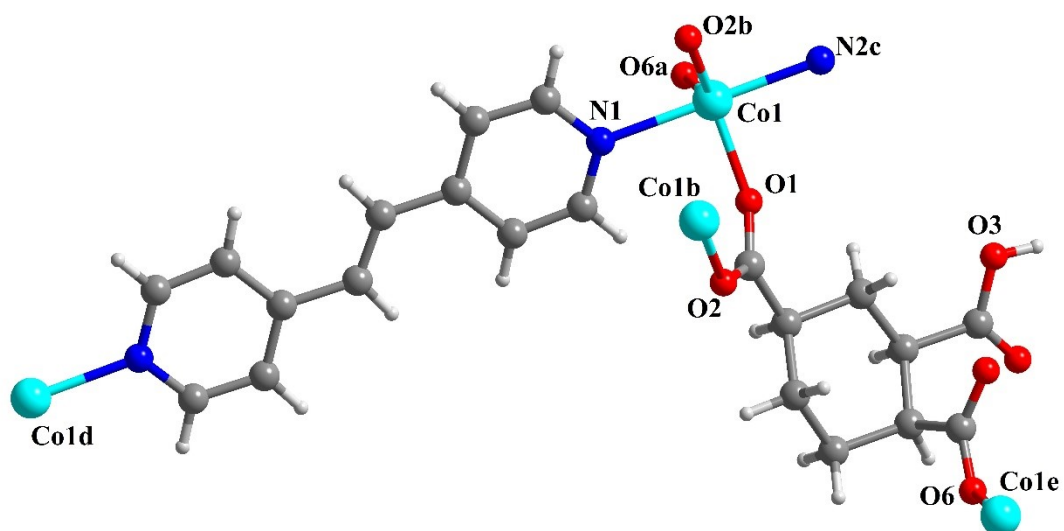

**Figure S2.** The coordination environment in asymmetric unit of 1.

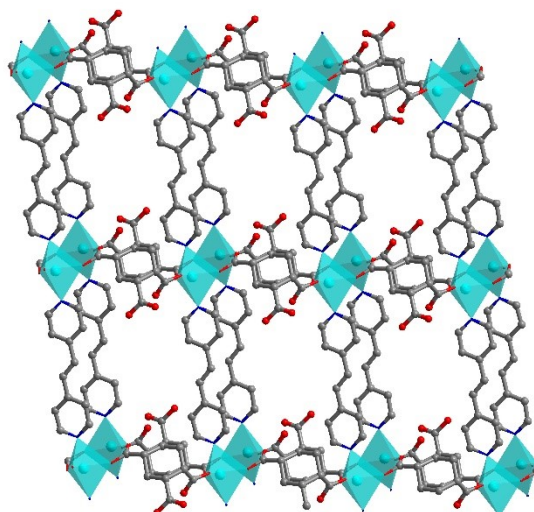

**Figure S3.** Polyhedral view of two dimensional coordination framework of **1** as double-side brick wall.

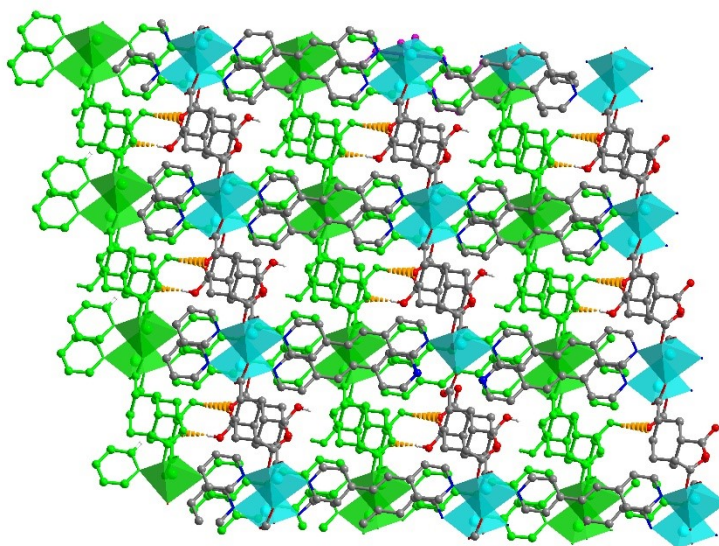

**Figure S4.** The hydrogen bonding interaction between the two layers of **1**.

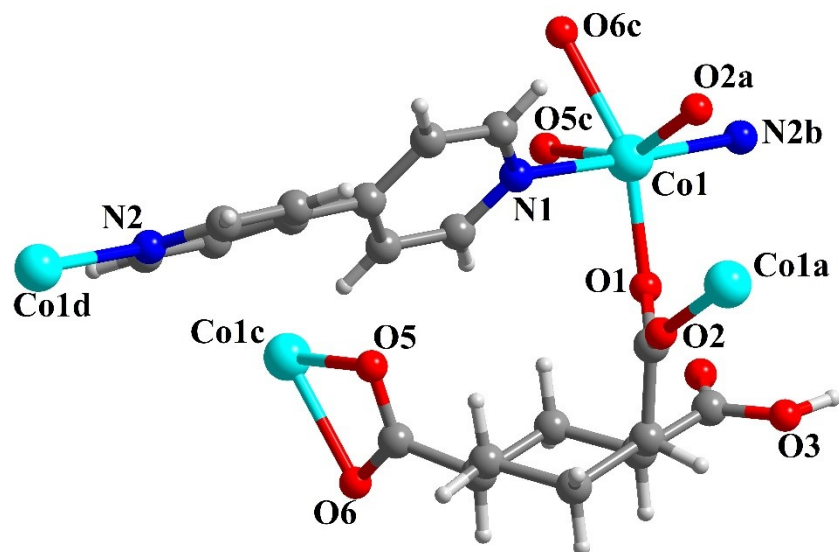

**Figure S5.** The coordination environment in asymmetric unit of **2**.

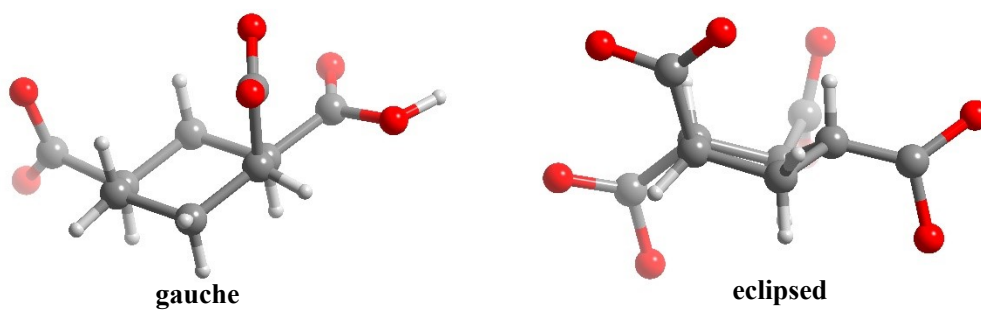

**Figure S6.** The different conformations for Hchtc (left) and Hcptc (right) ligands.

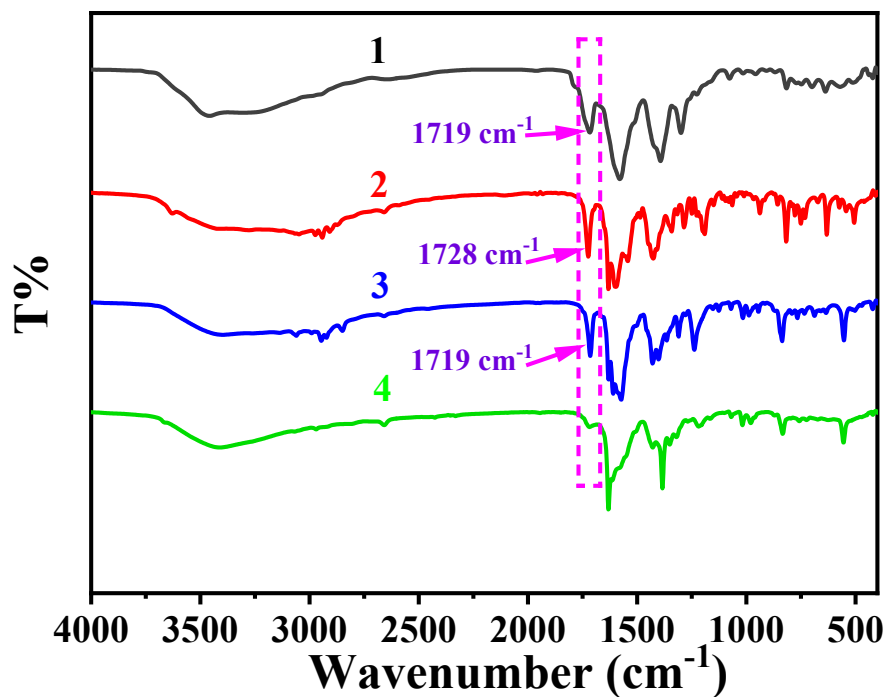

**Figure S7.** The FTIR spectra for **1-4**, in which the strong absorption peak at about  $1720\text{ cm}^{-1}$  is relative to the stretching vibration of  $-\text{COOH}$  group.

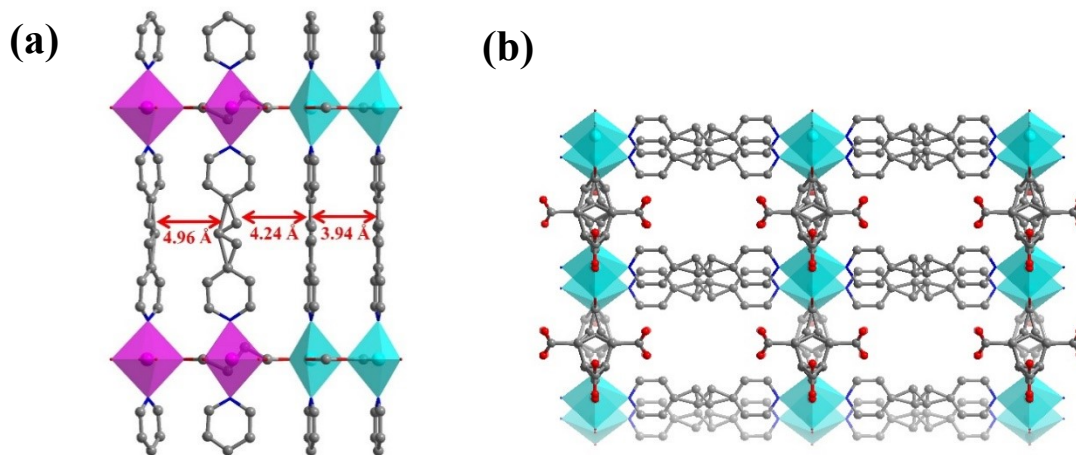

**Figure S8.** (a) The distances among the bpe ligands in different positions, (b) the coordination layer constructed from dinuclear units and bpe ligands for **4**, which is similar to the layer frameworks in **1** and **2**.

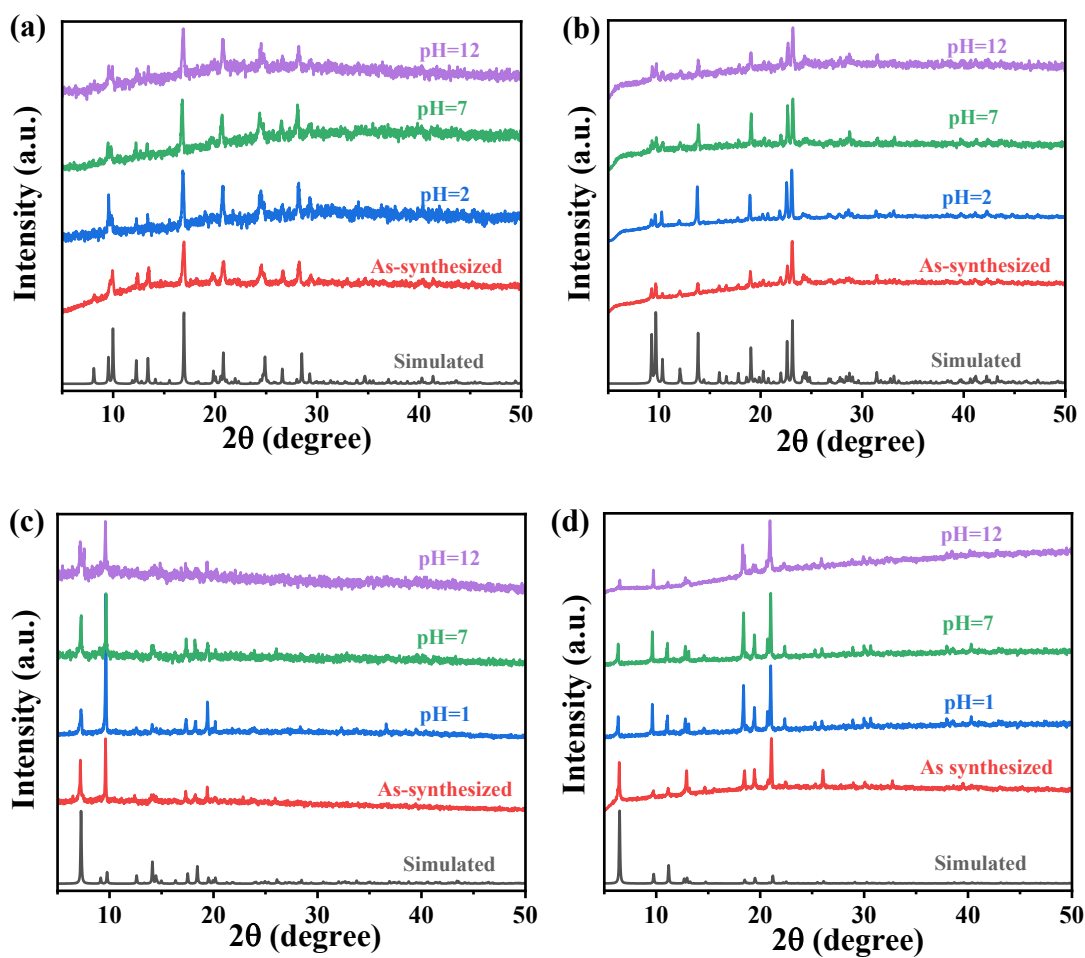

**Figure S9.** PXRD patterns of the as-synthesized sample and the samples immersed in solutions with different pH values for **1** (a), **2** (b), **3** (c) and **4** (d) respectively.

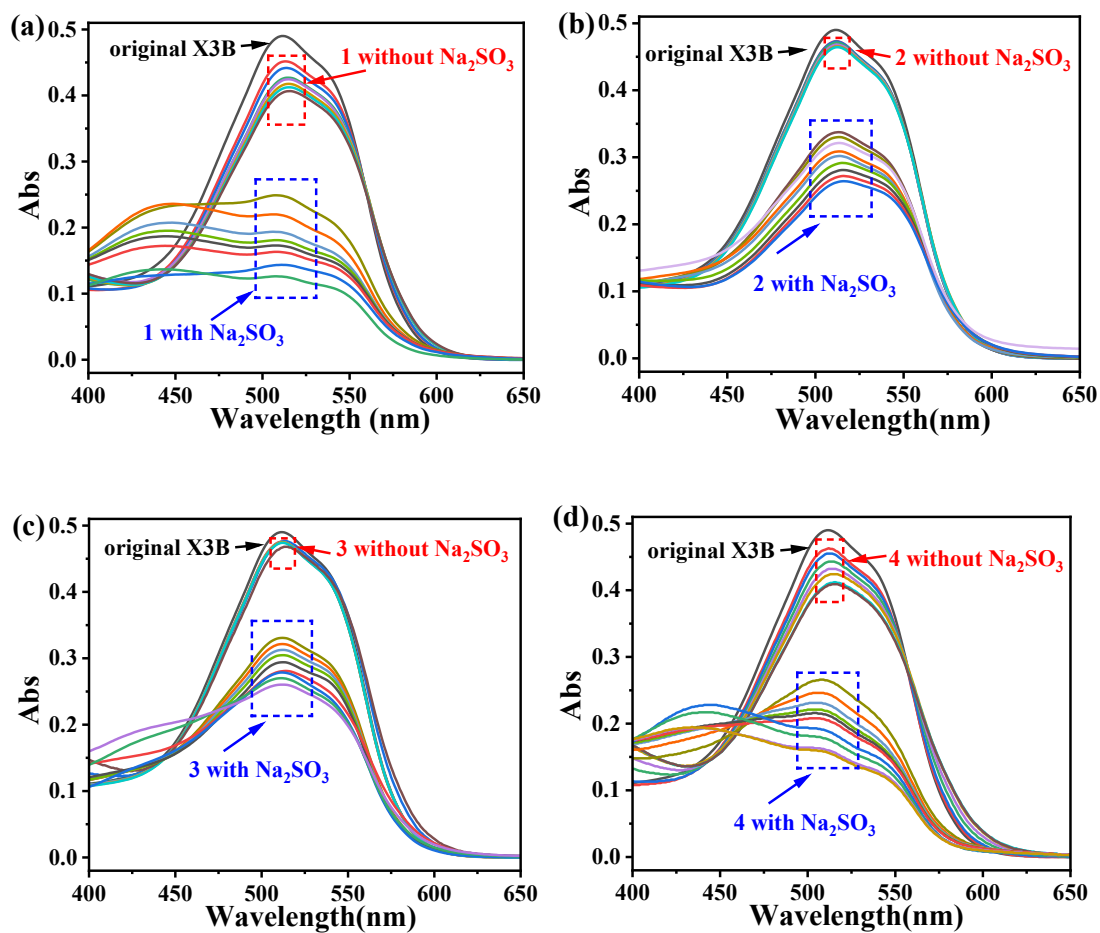

**Figure S10.** UV-Vis adsorption spectra of the time-dependent adsorption (red dash frame) and degradation (blue dash frame) of X3B for **1** (a), **2** (b), **3** (c) and **4** (d). From top to bottom, the lines within the frames correspond to the curves from 10 min to 150 min.

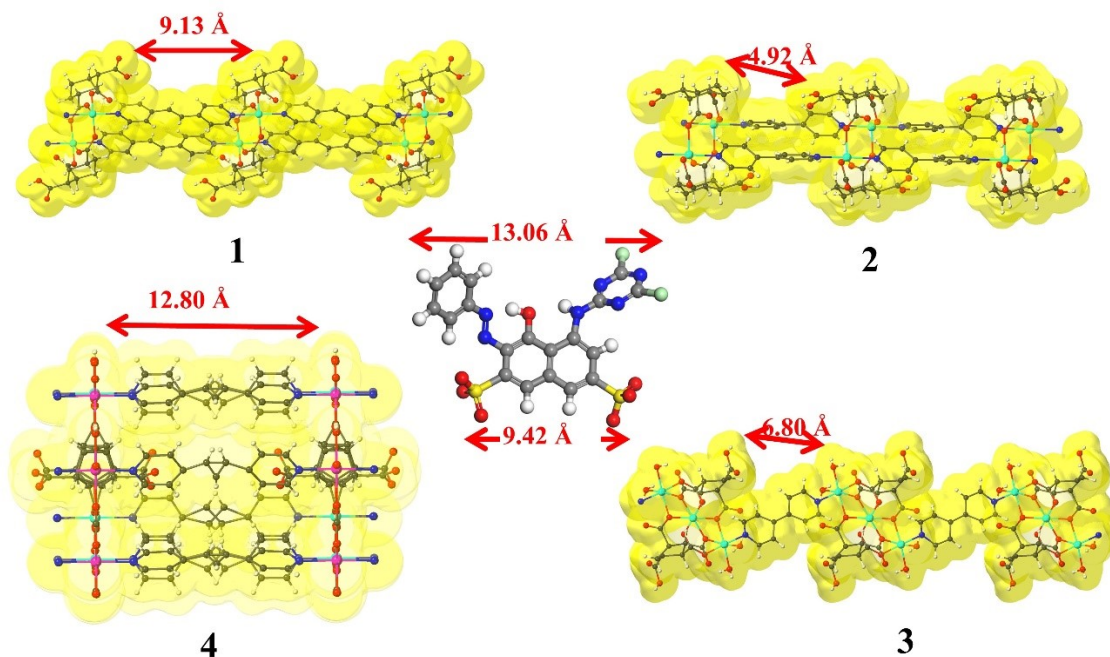

**Figure S11.** The molecular size of X3B, and the distances between the two metallic units separated by the bpe ligand in 1 and 4, and the 4,4'-bpy ligands in 2 and 3.

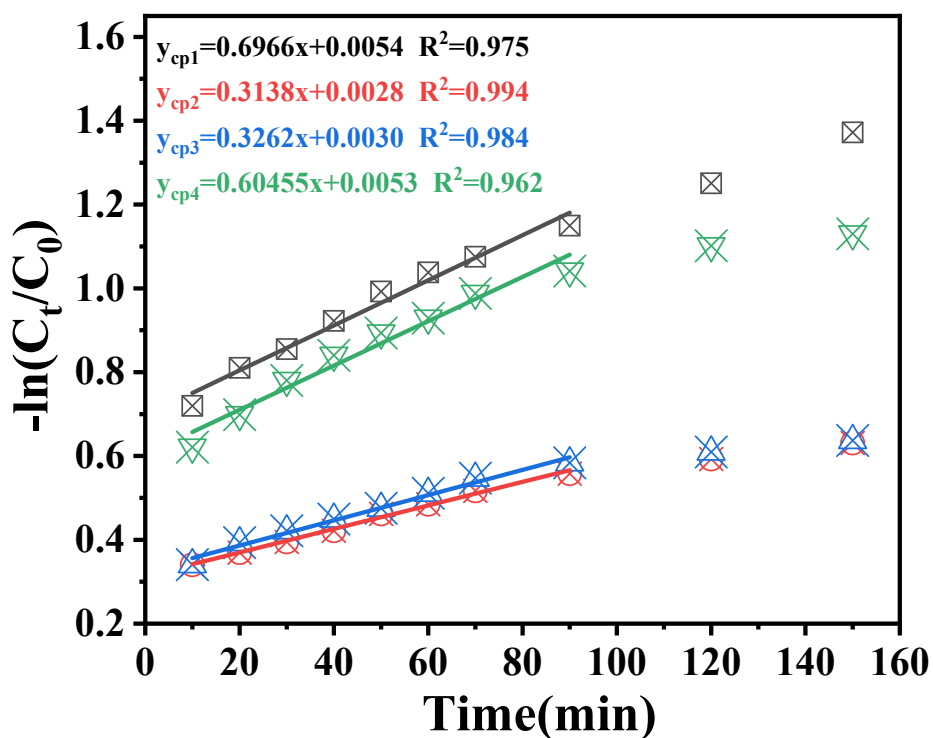

**Figure S12.** The time-dependent degradation of X3B for 1-4 fitted by pseudo-first-order simulation.



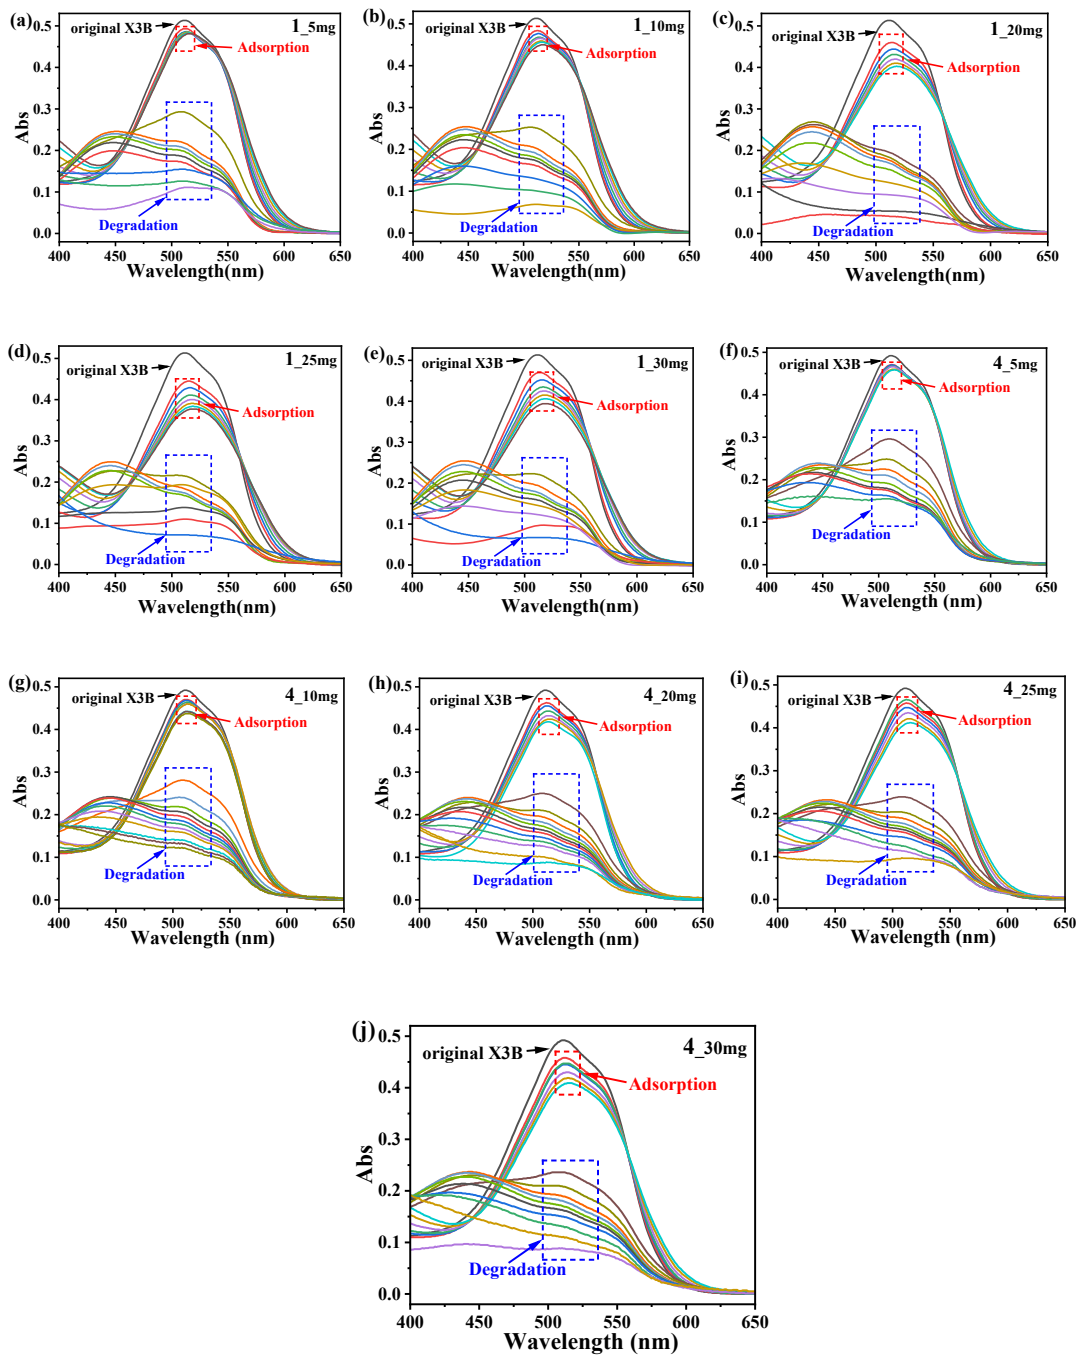

**Figure S13.** UV-Vis adsorption spectra of the time-dependent adsorption and degradation of X3B for **1** (a-e) and **4** (f-j) in different addition amounts. From top to bottom, the lines within the frames correspond to the curves from 10 min to 150 min.

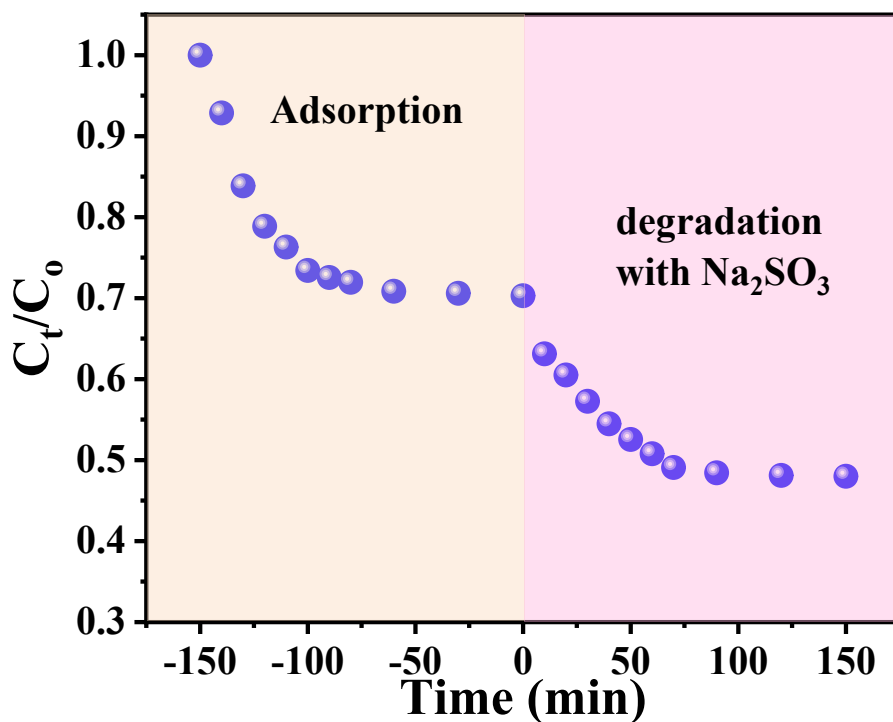

**Figure S14.** The adsorption and degradation of X3B for the documented crystal  $[\text{Co}_2(\text{cptc})(\text{bpe})_{0.5}(\text{H}_2\text{O})_2] \cdot 2\text{H}_2\text{O}$ .

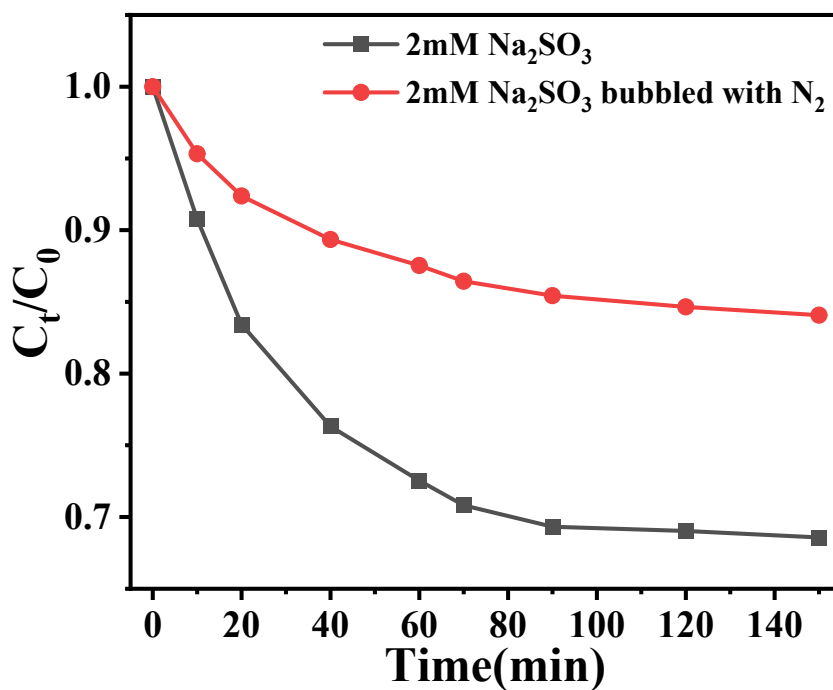

**Figure S15.** The degradation of X3B in 2 mM  $\text{Na}_2\text{SO}_3$  solution can be depressed under the  $\text{N}_2$  atmosphere.

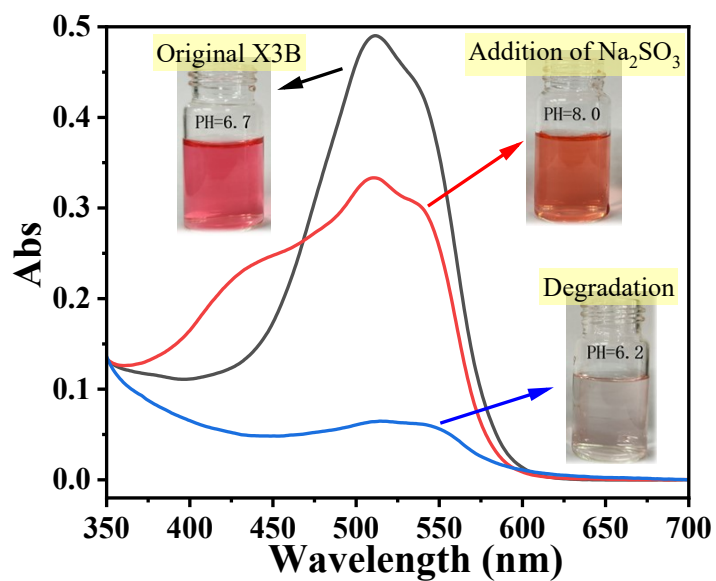

**Figure S16.** The differences of UV-vis absorption and colors of X3B solution during the degradation.

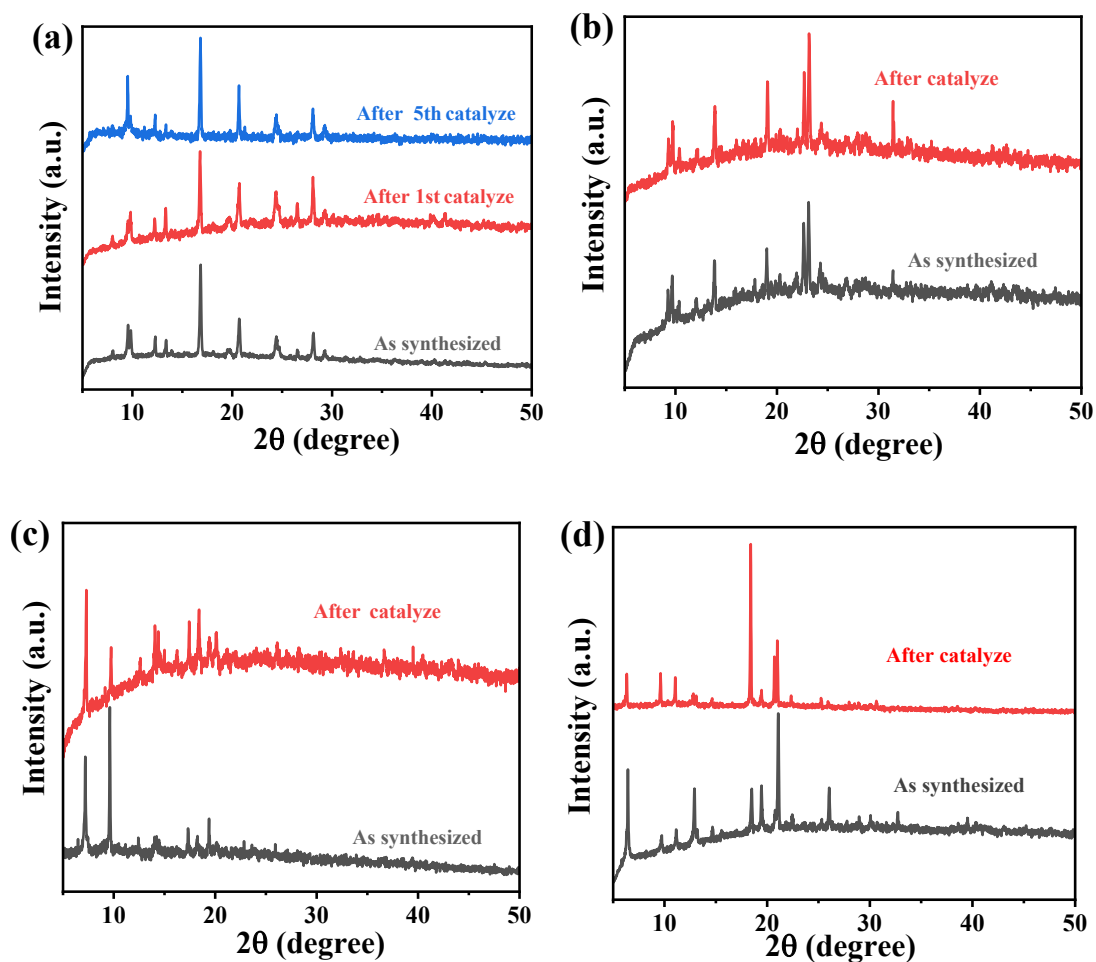

**Figure S17.** PXRD patterns after catalytic measurements of samples 1 (a), 2 (b), 3 (c) and 4 (d).

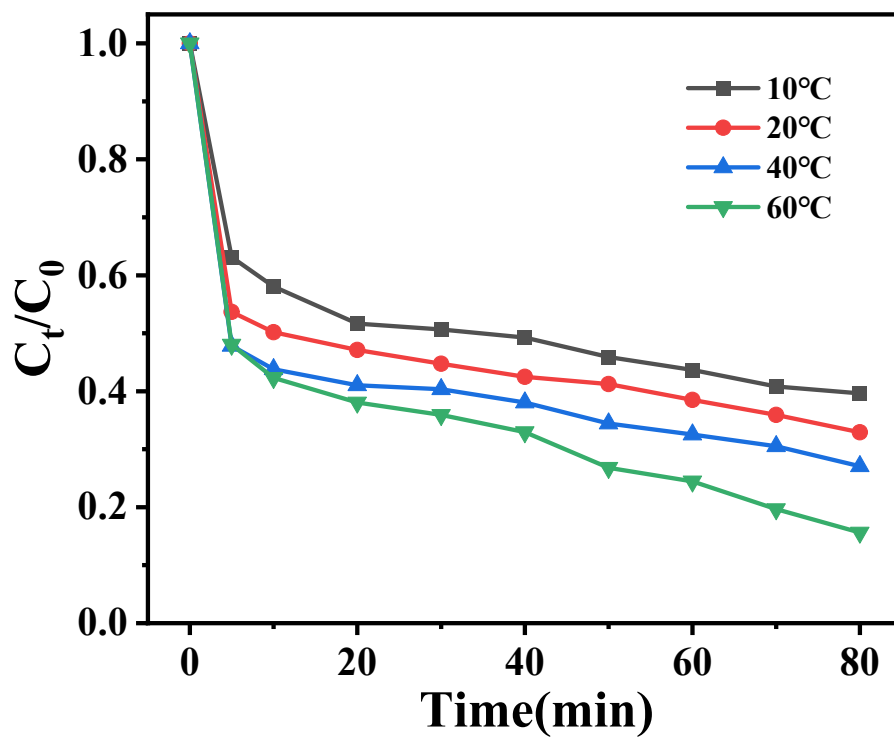

**Figure S18.** The different degradation of X3B in various temperatures for **1** (X3B, 20 mg/L; Na<sub>2</sub>SO<sub>3</sub>, 2 mM; **1**, 5 mg).

**Table S1.** Overview of materials in degradation of X3B through AOPs.

| Materials                              | Catalytic      | Reaction conditions |                  |                                                                            |           |                    |     | Reference        |
|----------------------------------------|----------------|---------------------|------------------|----------------------------------------------------------------------------|-----------|--------------------|-----|------------------|
|                                        | efficiency (%) | Dosage of catalyst  | C <sub>X3B</sub> | Oxidant / Radical                                                          | Temp. (K) | Energy             | pH  |                  |
| FePz(dtnCl <sub>2</sub> ) <sub>4</sub> | 97%            | 0.4 mg              | 0.1 mM           | H <sub>2</sub> O <sub>2</sub> / <sup>•</sup> OH                            | 303       | 500 W halogen lamp | 2   | <i>S1</i>        |
| Cadmium borophosphate                  | 90%            | 167 mg              | 40 ppm           | H <sub>2</sub> O <sub>2</sub> / <sup>•</sup> OH                            | R.T.      | Mercury lamp(375W) | -   | <i>S2</i>        |
| Steel slag                             | 79.2%          | 10 g/L              | 20 mg/L          | S <sub>2</sub> O <sub>8</sub> <sup>2-</sup> /SO <sub>4</sub> <sup>•-</sup> | R.T.      | Sunlight           | 5.6 | <i>S3</i>        |
| E/Co(II)/S(IV) system                  | 95.14%         | 10 μM               | 30 mg/L          | Na <sub>2</sub> SO <sub>3</sub> /SO <sub>4</sub> <sup>•-</sup>             | R.T.      | Electrical         | 7-9 | <i>S4</i>        |
| Gas sludge - S900                      | 90%            | 2 g                 | 61 mg/L          | H <sub>2</sub> O <sub>2</sub> / <sup>•</sup> OH                            | R.T.      | Electrical         | 3   | <i>S5</i>        |
| NH <sub>4</sub> NO <sub>3</sub>        | 94%            | 1.0 M               | 50 mg/L          | H <sub>2</sub> O <sub>2</sub> / <sup>•</sup> OH                            | R.T.      | Electrical         | -   | <i>S6</i>        |
| Fe <sup>0</sup>                        | 74.1%          | 0.2 mM              | 20 mg/L          | Na <sub>2</sub> SO <sub>3</sub> /SO <sub>4</sub> <sup>•-</sup>             | R.T.      | None               | 6   | <i>S7</i>        |
| CuFe@C composite                       | 98%            | 0.05 g/L            | 50 mg/L          | PMS/SO <sub>4</sub> <sup>•-</sup> and <sup>•</sup> OH                      | R.T.      | None               | 7   | <i>S8</i>        |
| <b>1</b>                               | 90%            | 20 mg               | 20 mg/L          | Na <sub>2</sub> SO <sub>3</sub> /SO <sub>4</sub> <sup>•-</sup>             | R.T.      | None               | 7   | <i>This work</i> |
| <b>4</b>                               | 81%            | 20 mg               | 20 mg/L          | Na <sub>2</sub> SO <sub>3</sub> /SO <sub>4</sub> <sup>•-</sup>             | R.T.      | None               | 7   |                  |

**Table S2.** Crystal data and structure refinements for **1-4**.

|                                                          | <b>1</b> (150 K)                                                 | <b>2</b> (293 K)                                                 | <b>3</b> (150 K)                                                   | <b>4</b> (150 K)                                                              |
|----------------------------------------------------------|------------------------------------------------------------------|------------------------------------------------------------------|--------------------------------------------------------------------|-------------------------------------------------------------------------------|
| empirical formula                                        | C <sub>21</sub> H <sub>20</sub> N <sub>2</sub> O <sub>6</sub> Co | C <sub>19</sub> H <sub>20</sub> N <sub>2</sub> O <sub>7</sub> Co | C <sub>14</sub> H <sub>18</sub> NO <sub>12</sub> Co <sub>1.5</sub> | C <sub>33</sub> H <sub>28</sub> N <sub>4</sub> O <sub>9</sub> Co <sub>2</sub> |
| <i>M</i>                                                 | 455.32                                                           | 447.30                                                           | 480.69                                                             | 742.45                                                                        |
| wavelength (Å)                                           | 0.71073                                                          | 1.54178                                                          | 0.71073                                                            | 1.54178                                                                       |
| crystal system                                           | Triclinic                                                        | Monoclinic                                                       | Triclinic                                                          | Orthorhombic                                                                  |
| space group                                              | P1                                                               | P1                                                               | P1                                                                 | <i>Pbam</i>                                                                   |
| <i>a</i> /Å                                              | 9.1990(8)                                                        | 9.5570(6)                                                        | 7.2508(6)                                                          | 27.8698(9)                                                                    |
| <i>b</i> /Å                                              | 9.6032(10)                                                       | 10.0876(7)                                                       | 10.4687(11)                                                        | 9.5761(3)                                                                     |
| <i>c</i> /Å                                              | 10.9409(10)                                                      | 10.4840(7)                                                       | 12.7942(10)                                                        | 13.6522(4)                                                                    |
| $\alpha$ /°                                              | 91.168(2)                                                        | 112.632(7)                                                       | 72.323(4)                                                          | 90                                                                            |
| $\beta$ /°                                               | 94.667(2)                                                        | 96.062(6)                                                        | 89.396(3)                                                          | 90                                                                            |
| $\gamma$ /°                                              | 104.944(2)                                                       | 98.241(6)                                                        | 75.982(3)                                                          | 90                                                                            |
| Vol/Å <sup>3</sup>                                       | 930.19(15)                                                       | 908.86(11)                                                       | 895.66(14)                                                         | 3643.6(2)                                                                     |
| <i>Z</i>                                                 | 2                                                                | 2                                                                | 2                                                                  | 4                                                                             |
| $\rho_{\text{calcd}}$ /g cm <sup>-3</sup>                | 1.626                                                            | 1.634                                                            | 1.782                                                              | 1.353                                                                         |
| $\mu$ /mm <sup>-1</sup>                                  | 0.967                                                            | 7.833                                                            | 1.473                                                              | 7.598                                                                         |
| reflns collected                                         | 7318                                                             | 4188                                                             | 5593                                                               | 23630                                                                         |
| unique reflns                                            | 3510(0.0520)                                                     | 2779(0.0338)                                                     | 3247(0.0399)                                                       | 3485(0.1047)                                                                  |
| <i>S</i>                                                 | 1.040                                                            | 0.938                                                            | 1.078                                                              | 1.047                                                                         |
| $R_1^a, wR_2^b$ ( <i>I</i> ><br>2 $\sigma$ ( <i>I</i> )) | 0.0695, 0.1776                                                   | 0.0414, 0.0979                                                   | 0.0747, 0.2038                                                     | 0.0769, 0.1953<br>(squeeze)                                                   |
| $R_1^a, wR_2^b$ (all data)                               | 0.1296, 0.2292                                                   | 0.0498, 0.1002                                                   | 0.1093, 0.2527                                                     | 0.1019, 0.2164<br>(squeeze)                                                   |

$$^a R_1 = \frac{\sum ||F_o| - |F_c||}{\sum |F_o|}, \quad ^b wR_2 = [\frac{\sum w(F_o^2 - F_c^2)^2}{\sum w(F_o^2)^2}]^{1/2}$$

**Table S3.** The hydrogen bonding list for **1**, **2**, **3** and **4**.

| D-H...A             | d(D-H) | d(H...A) | d(D...A)  | <(DHA) |
|---------------------|--------|----------|-----------|--------|
| <b>1</b>            |        |          |           |        |
| O(3)-H(3O)...O(5)   | 0.84   | 1.83     | 2.668(7)  | 171.3  |
| <b>2</b>            |        |          |           |        |
| O(1W)-H(1WA)...O(6) | 0.82   | 1.90     | 2.703(4)  | 165.6  |
| O(3)-H(3O)...O(1W)  | 0.95   | 1.74     | 2.691(4)  | 174.2  |
| C(10)-H(10A)...O(5) | 0.93   | 2.63     | 3.343(4)  | 134.0  |
| C(14)-H(14A)...O(3) | 0.93   | 2.61     | 3.282(4)  | 129.8  |
| C(16)-H(16A)...O(4) | 0.93   | 2.61     | 3.316(5)  | 133.0  |
| C(17)-H(17A)...O(5) | 0.93   | 2.52     | 3.117(4)  | 122.1  |
| C(18)-H(18A)...O(2) | 0.93   | 2.35     | 2.936(4)  | 120.5  |
| <b>3</b>            |        |          |           |        |
| O(1W)-H(1WA)...O(6) | 0.64   | 2.07     | 2.708(7)  | 173.2  |
| O(1W)-H(1WB)...O(4) | 0.85   | 1.88     | 2.573(14) | 137.6  |
| O(2W)-H(2WA)...O(2) | 0.85   | 1.99     | 2.730(10) | 145.0  |
| <b>4</b>            |        |          |           |        |
| O(1W)-H(1WA)...O(6) | 0.78   | 1.92     | 2.695(7)  | 176.4  |
| O(1W)-H(1WB)...O(1) | 0.78   | 1.93     | 2.617(7)  | 146.7  |

**Reference:**

- S1.** Z. Zhang, Q. Peng, J. Sun, L. Fang and K. Deng, *Ind. Eng. Chem. Res.*, 2013, **52**, 13342–13349.
- S2.** Y. Feng, L. Lv, D. Bi, Z. Zhong, J. Li, Z. Yue, Z. Zeng, S. Zhang and Z. Meng, *CrystEngComm*, 2022, **24**, 479-483.
- S3.** Z. Wang, Y. Guo, Y. Chen, S. Liang, J. Zuo and X. Yu, *J. Environ. Eng.*, 2016, **142**, 04015048.
- S4.** Y. Ji, W. Li, W. Cao, Z. Yang, C. Zheng and W. Zhang, *J. Environ. Chem. Engin.*, 2024, **12**, 112792.
- S5.** L. Zhou, Y. Xiao, J. Liang, D. Tang and J. Sun, *Emerg. Contam.*, 2019, **5**, 61-69.
- S6.** S. Qiu, L. Yu, D. Tang, W. Ren, K. Chen and J. Sun, *Ind. Eng. Chem. Res.*, 2018, **57**, 4907–4915.
- S7.** P. Xie, Y. Guo, Y. Chen, Z. Wang, R. Shang, S. Wang, J. Ding, Y. Wan, W. Jiang and J. Ma, *Chem. Eng. J.*, 2017, **314**, 240–248.
- S8.** D. Zhao, W. Fan, Z. Wang, F. Tian, K. Xie, G. Liu, J. Liu, Y. Li and B. L. Li, *Sep. Purif. Technol.* 2024, **343**, 126997.
